# Supplementary material for: First Trimester Urine and Serum Metabolomics for Prediction of Preeclampsia and Gestational Hypertension: A Prospective Screening Study
Source: PubMed Central journal article supplement (PMC4613265; doi:10.3390/ijms160921520), 2015-09-08
Supplement: ijms-16-21520-s001.pdf [file ijms-16-21520-s001.pdf]

## Supplementary Information

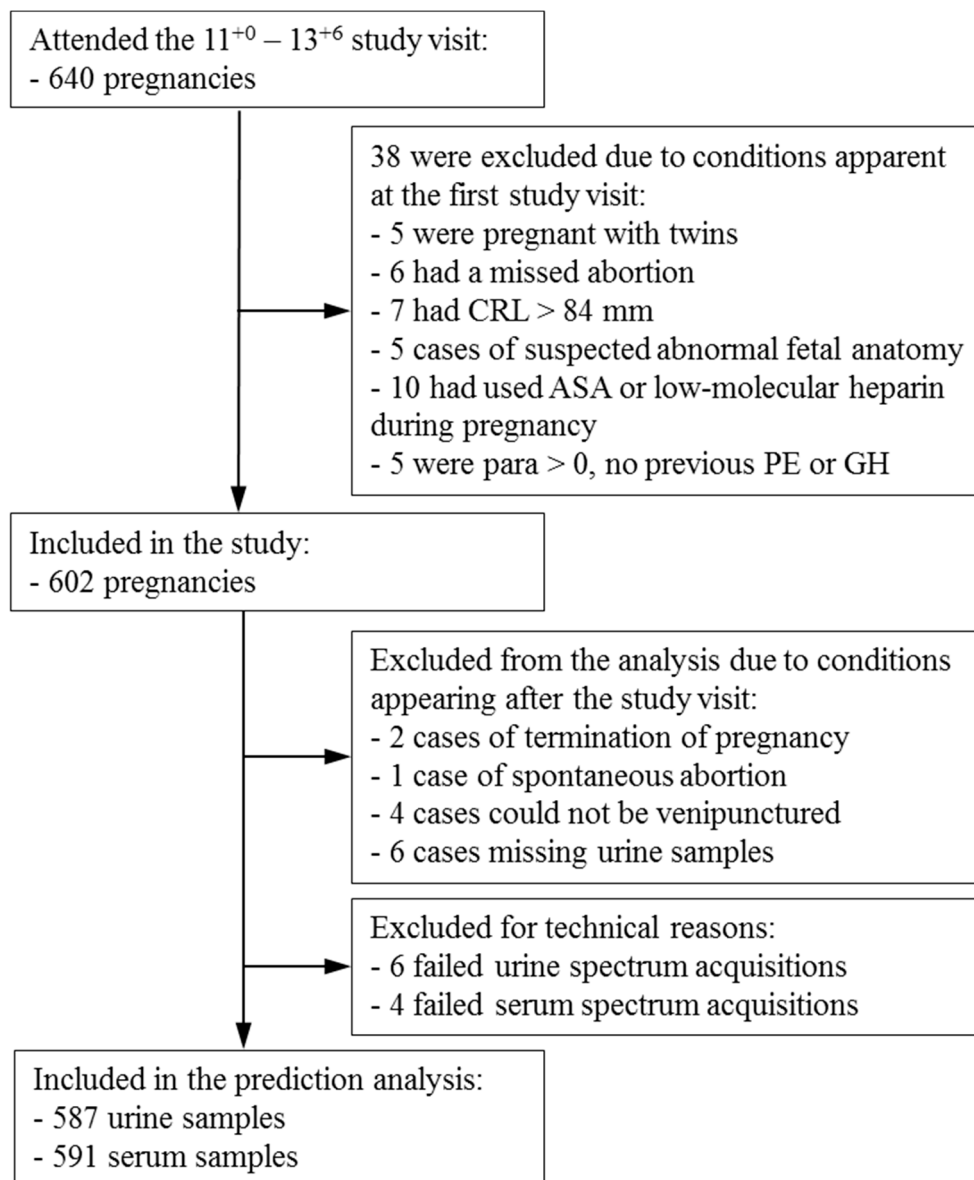

**Figure S1.** Flow chart describing participants included in the study. Abbreviations: ASA, Acetyl Salicylic acid; CRL, Crown rump length; GH, gestational hypertension; PE, preeclampsia.

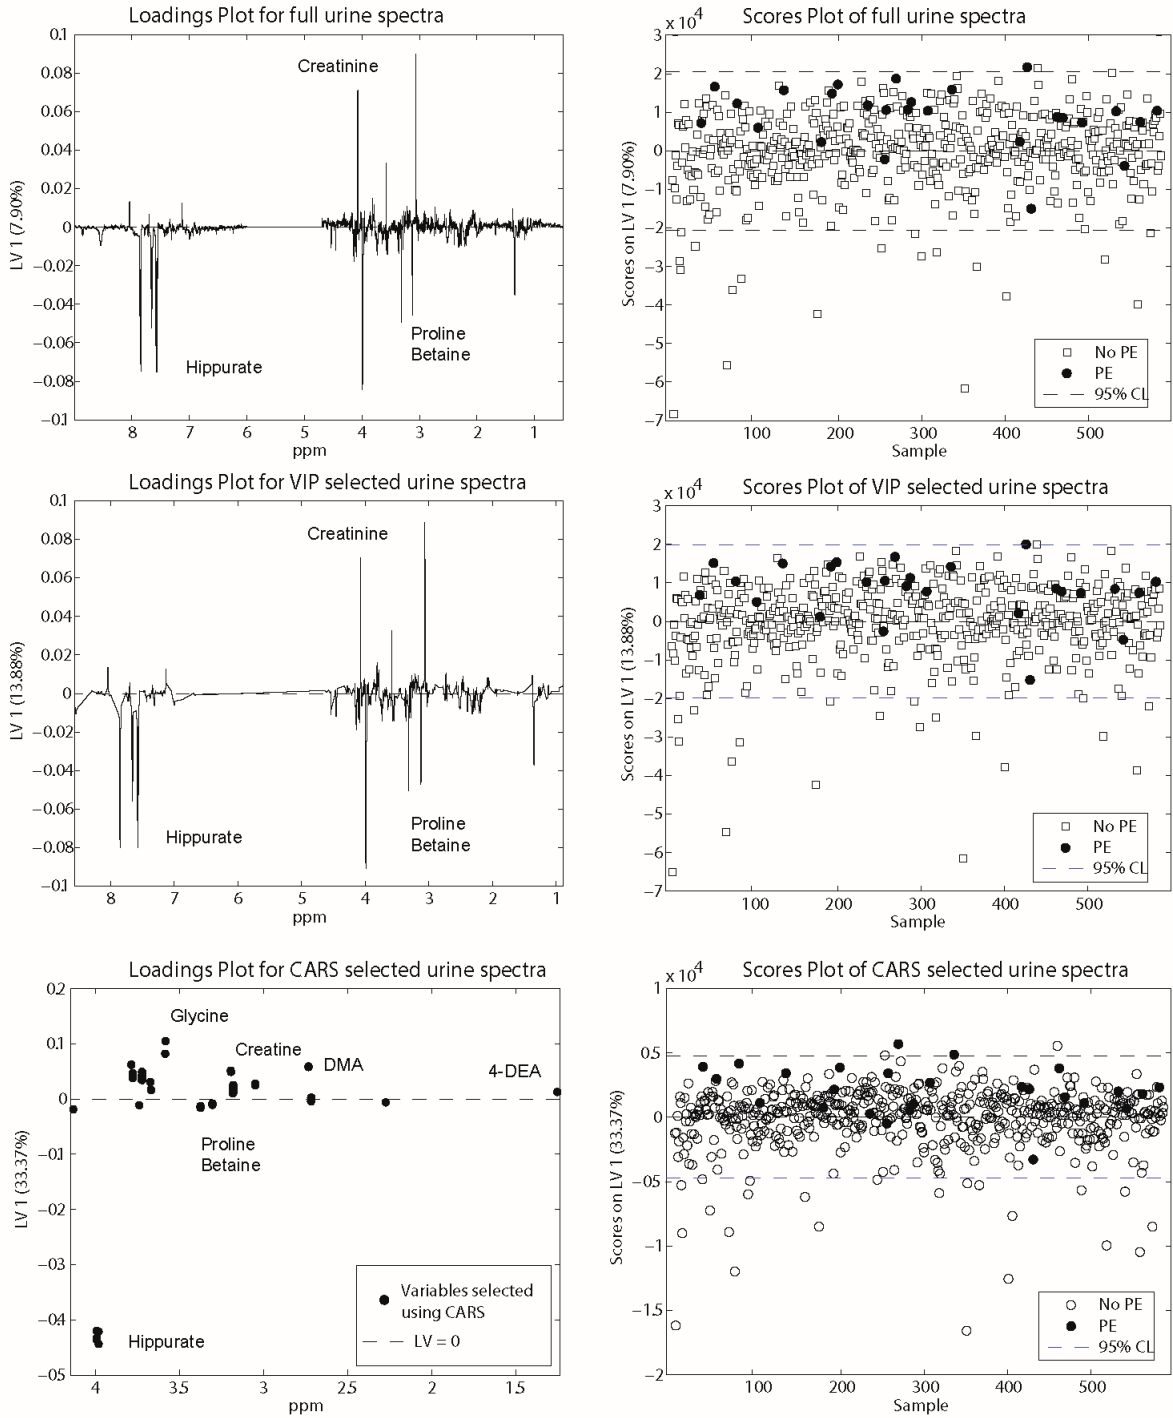

**Figure S2.** Scores and loadings for models predicting preeclampsia. Abbreviations: 4-DEA, 4-deoxythreonic acid; CARS, competitive adaptive reweighted sampling; CL, confidence limit; DMA, dimethylamine; LV, latent variable; PE, preeclampsia; ppm, parts per million; VIP, variable importance in projection.

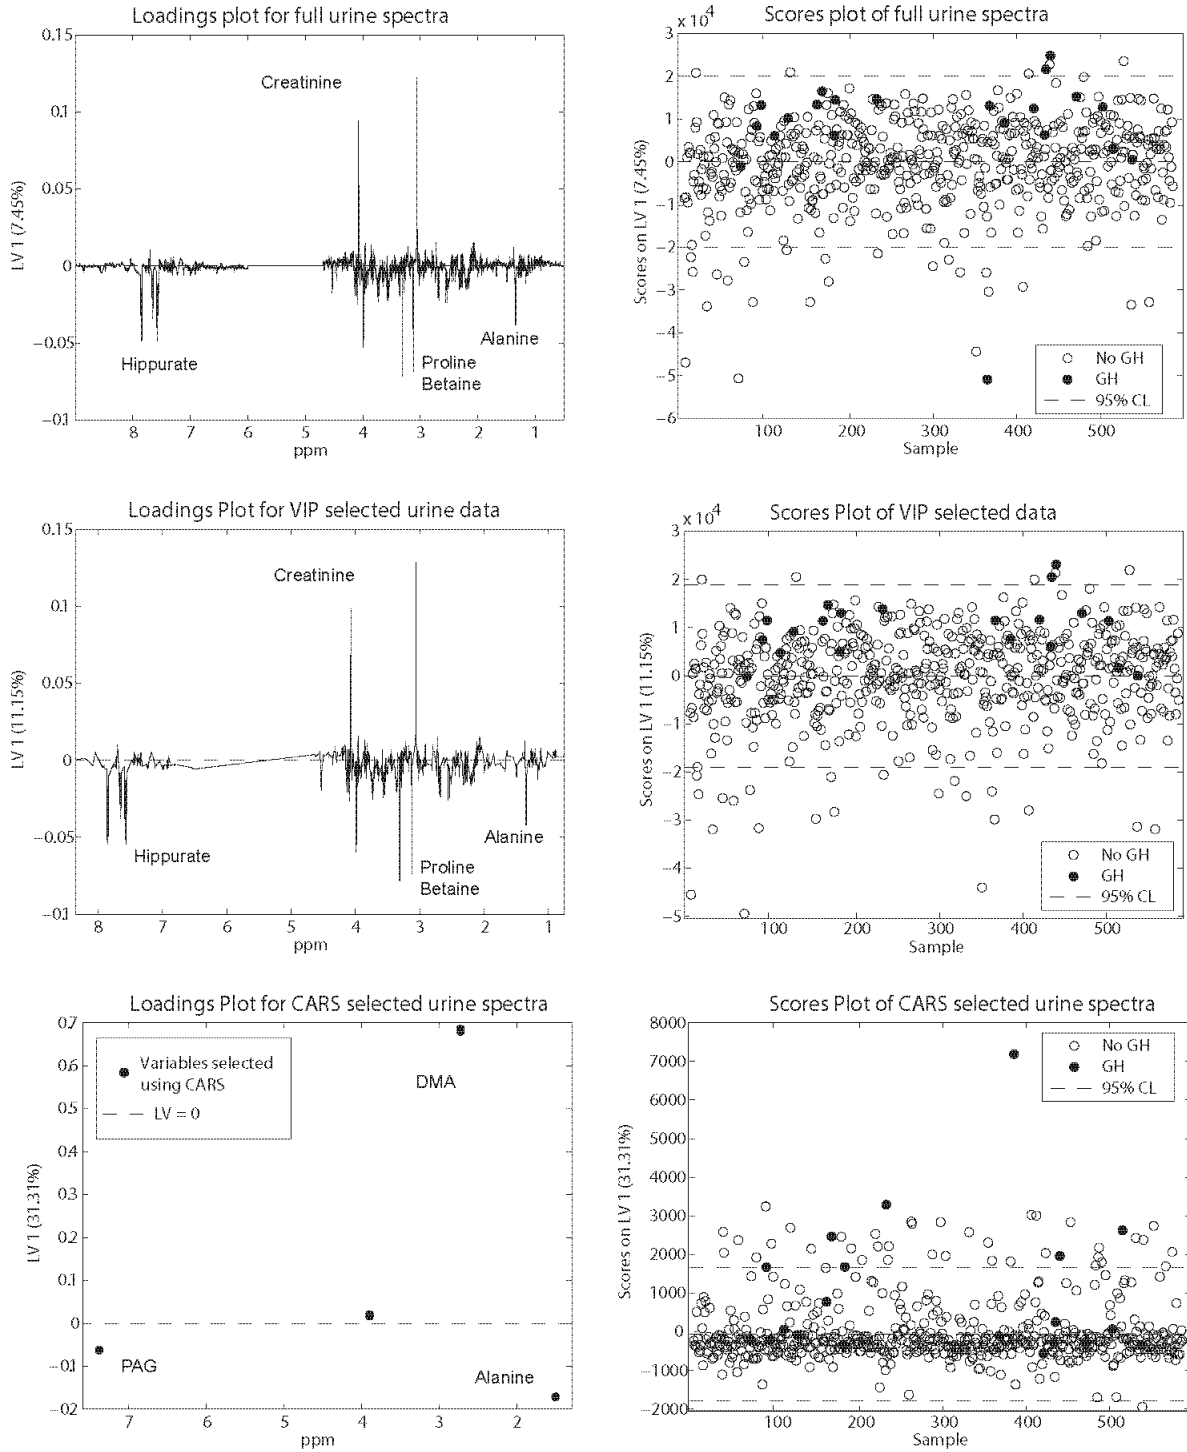

**Figure S3.** Scores and loadings for models predicting gestational hypertension with urine metabolomics. Abbreviations: 4-DEA, 4-deoxythreonic acid; CARS, competitive adaptive reweighted sampling; CL, confidence limit; GH, gestational hypertension; DMA, dimethylamine; LV, latent variable; ppm, parts per million; VIP, variable importance in projection.

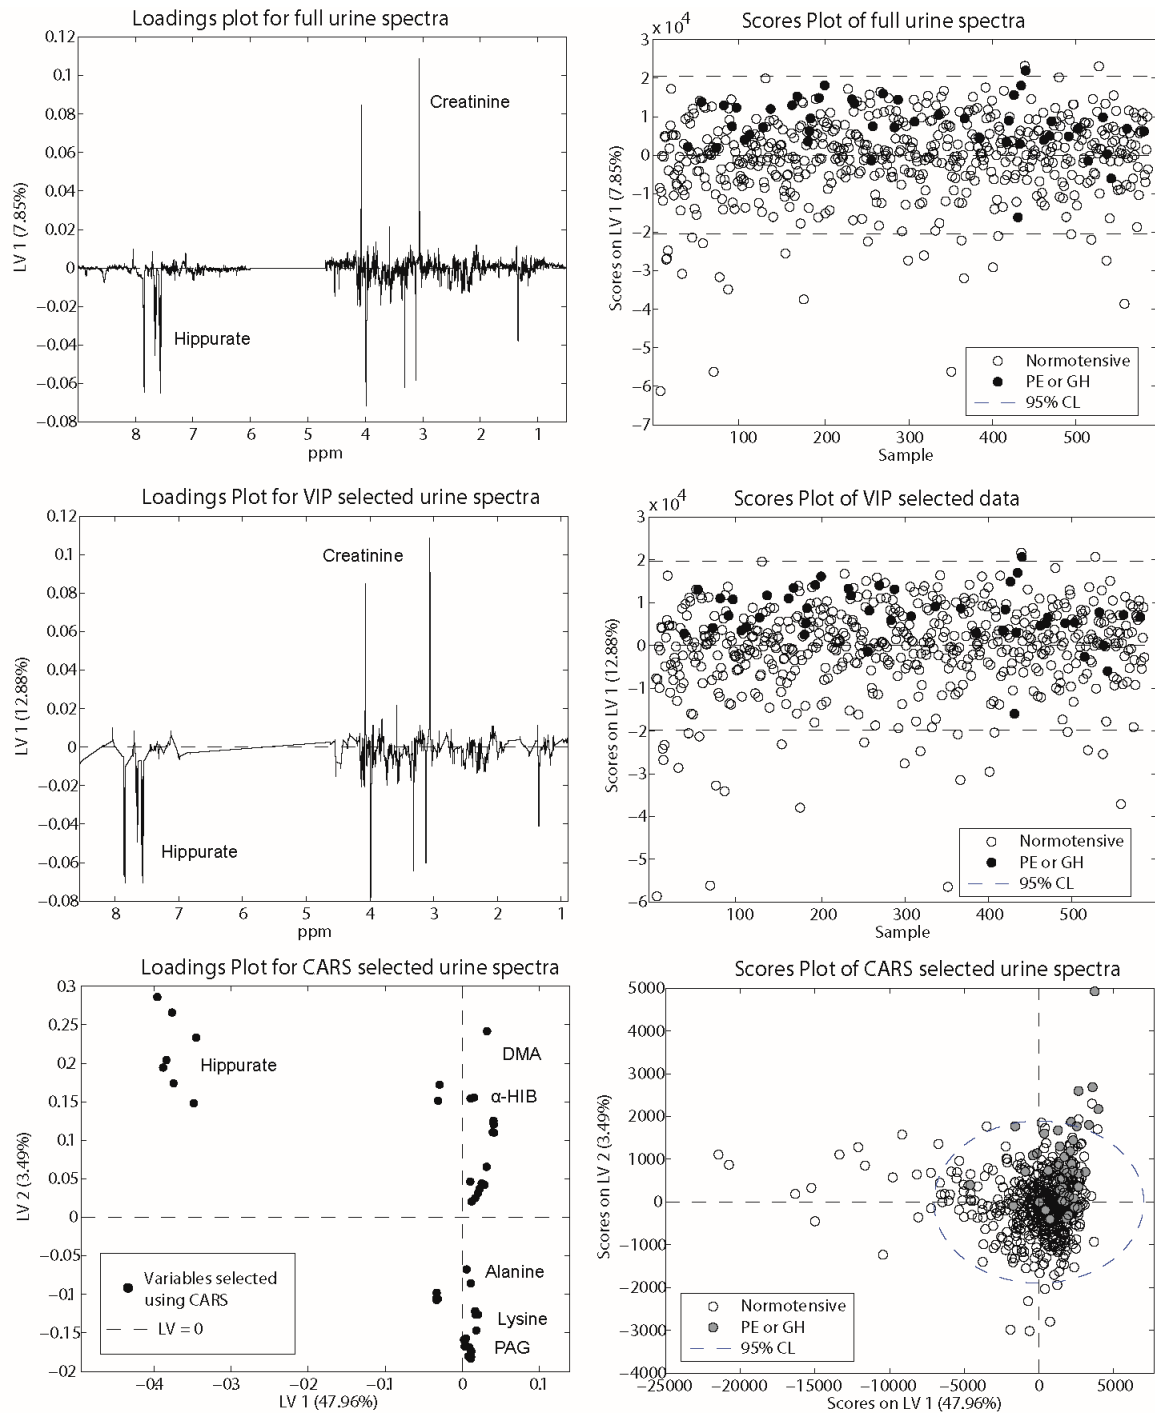

**Figure S4.** Scores and loadings for models predicting hypertensive disorders of pregnancy with urine metabolomics. Abbreviations: 4-DEA, 4-deoxythreonic acid;  $\alpha$ -HIB,  $\alpha$ -hydroxyisobutyrate; CARS, competitive adaptive reweighted sampling; CL, confidence limit; DMA, dimethylamine; GH, gestational hypertension; LV, latent variable; PAG, phenylacetylglutamine; PE, preeclampsia; ppm, parts per million; VIP, variable importance in projection.

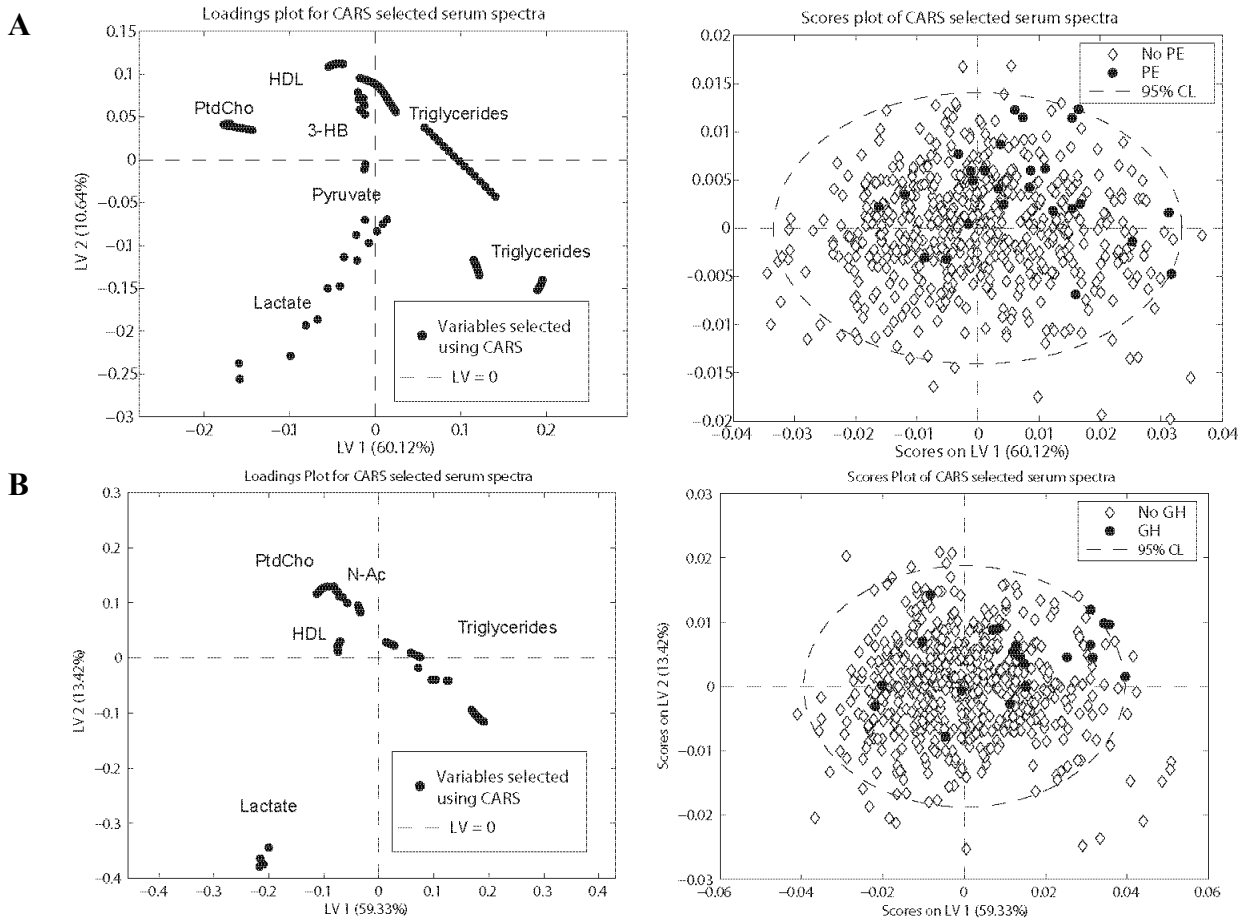

**Figure S5.** (A) Scores and loadings for models predicting preeclampsia with serum metabolomics; (B) Scores and loadings for models predicting gestational hypertension with serum metabolomics. Abbreviations: 3-HB, 3-hydroxybutyrate; CARS, competitive adaptive reweighted sampling; CL, confidence limit; GH, gestational hypertension; HDL, high density lipoprotein; LV, latent variable; N-Ac, N-acetyl glycoproteins; PE, preeclampsia; ppm, parts per million; PtdCho, phosphatidylcholines.

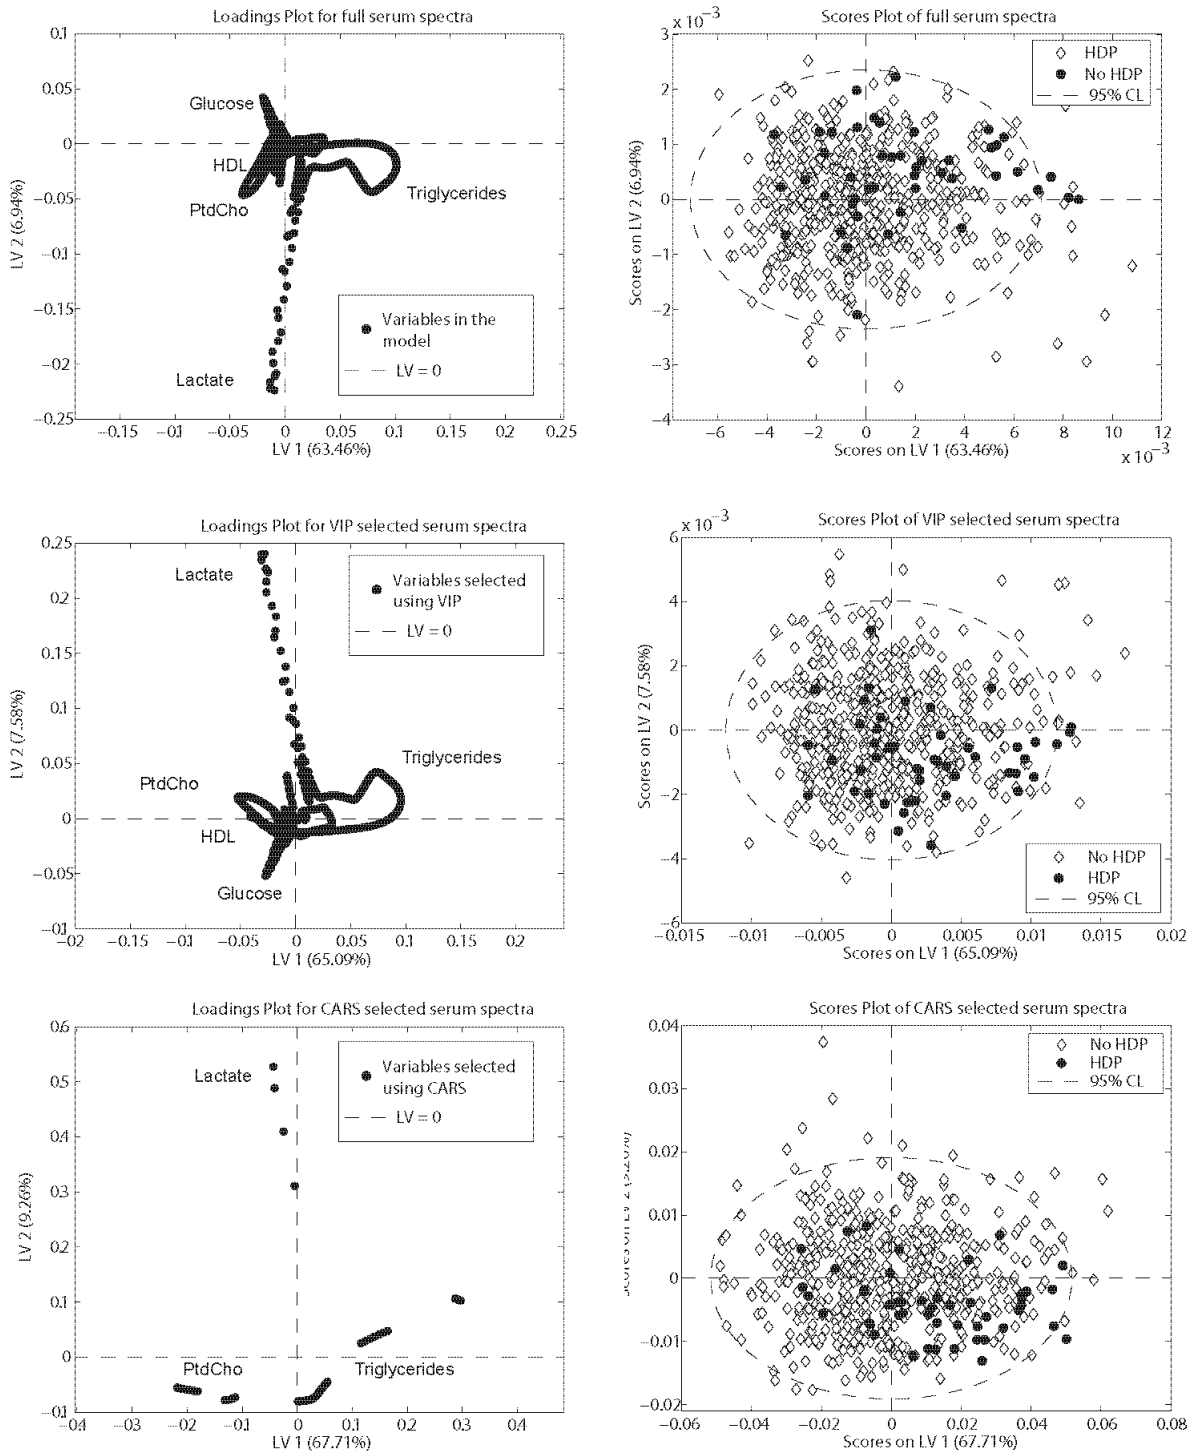

**Figure S6.** Scores and loadings for models predicting hypertensive disorders of pregnancy with serum metabolomics. Abbreviations: CARS, competitive adaptive reweighted sampling; CL, confidence limit; GH, gestational hypertension; HDL, high density lipoprotein; HDP, hypertensive disorders of pregnancy (PE or GH); LV, latent variable; PE, preeclampsia; ppm, parts per million; PtdCho, phosphatidylcholines.

**Table S1.** Metabolites Identified in <sup>1</sup>H Urine NMR spectra with aid from HSQC.

| Metabolite             | <sup>1</sup> H NMR Shift, Multiplicity <sup>a</sup> , ( <sup>13</sup> C Shift) <sup>b</sup> |
|------------------------|---------------------------------------------------------------------------------------------|
| 1-Methylhistidine      | 3.140m (30.9), 3.730m (36.5), 3.930s (56.0), 7.210t (122.0), 8.220s (140.0), (130)          |
| 1-Methylnicotinamide   | 4.469s (51.4), 8.886d (146.4), 8.957d (150.0)                                               |
| 3-Aminoisobutyrate     | 1.200t (17.8), 2.037m (46.1)                                                                |
| 3-Hydroxyisobutyrate   | 1.075d (16.5), 2.490m (47.6), 67.6m (186.9)                                                 |
| 3-Hydroxyisovalerate   | 1.274s (31.0), 2.370s (52.3), (72.5)                                                        |
| 3-Methylhistidine      | 3.270m (27.6), 3.320m (27.6), 3.770m (35.0)                                                 |
| 4-Deoxyerythronic acid | 1.11d (18.26), 4.08d (78.67), 4.1m (71.54)                                                  |
| 4-Deoxythreonic acid   | 1.236d (21.2), 3.85m (79.1), 4.06m (71.7), (176.8)                                          |
| 4-Hydroxyphenylacetate | 3.450s (46.8), 6.850d (118.2), 7.16d (133.0)                                                |
| Acetate                | 1.93s (26.1)                                                                                |
| Acetoacetate           | 2.287 (32.7), 3.343s (55.5)                                                                 |
| Alanine                | 1.489d (19.1), 3.809q (53.3)                                                                |
| Allantoin              | 5.390m (65.9)                                                                               |
| Ascorbic acid          | 3.770s (65.3), 4.520d (81.1), (178)                                                         |
| Betaine                | 3.270 (55.5), 3.890 (69.0)                                                                  |
| Carnitine              | 2.450 (45.7), 3.202 (56.4), 3.430 (73.0)                                                    |
| Choline                | 3.230 (57.1), 3.520 (70.1)                                                                  |
| Cis-aconitate          | 3.130 (46.2), 5.74 (127)                                                                    |
| Citrate                | 2.550d (47.7), 2.700d (47.7)                                                                |
| Creatine               | 3.040s (39.6), 3.940 (56.4)                                                                 |
| Creatinine             | 3.052s (32.7), 4.070s (59.0), (172), (191)                                                  |
| Dimethylamine          | 2.730s (37.3)                                                                               |
| Dimethylglycine        | 2.933s (46.4)                                                                               |
| Formate                | 8.500s (168.0)                                                                              |
| Fumarate               | 6.528s                                                                                      |
| Glucose                | 5.210 (94.7)                                                                                |
| Glucuronic acid        | 3.520 (74.5), 3.520 (78.4), 5.250d (94.7), 3.560 (74.0)                                     |
| Glycine                | 3.580s (44.2)                                                                               |
| Guanidoacetate         | 3.806 (47.9)                                                                                |
| Hippurate              | 3.970d (46.6), 7.550t (131.0), 7.640t (134.0), 7.830t (129.0)                               |
| Histidine              | 3.220 (30.1), 3.282 (30.1), 4.016 (57.0), 7.167s (120.2), 8.060s (138.0), (133)             |
| Hypoxanthine           | 8.177s (144.0), 8.200s (148.0)                                                              |
| Lactate                | 1.337d (22.4), 4.127q (71.5), (185)                                                         |
| Lysine                 | 1.449 (24.1), 1.524 (24.1), 1.740 (29.5), 1.910 (33.0), 3.030 (42.3), 3.790 (57.0)          |
| Methylamine            | 2.617s (27.8)                                                                               |
| Methylmalonate         | 3.158 (44.3)                                                                                |
| Myo-inositol           | 3.250 (77.1), 3.300 (76.9)                                                                  |
| p-Cresol sulfate       | 2.346s (23.1), (133.0), (139.0)                                                             |
| Phenylacetylglutamine  | 2.27m (34.0), 3.676 (45.5), 4.010 (57.3), 7.352t (131.7), 7.362t (130.0),<br>7.428t (131.6) |
| Proline betaine        | 3.110s (48.6), 3.310s (54.8), 2.29m (69), 2.17m (79), 2.51m (28.1)                          |
| Propylene Glycol       | 1.150d (20.4), 3.470d (69.1), 3.550d, 3.900m (70.6)                                         |

Table S1. *Cont.*

| Metabolite                       | <sup>1</sup> H NMR Shift, Multiplicity <sup>a</sup> , ( <sup>13</sup> C Shift) <sup>b</sup> |
|----------------------------------|---------------------------------------------------------------------------------------------|
| Pyruvate                         | 2.382s (29.3)                                                                               |
| Scyllo-inositol                  | 3.366s (76.6)                                                                               |
| Succinate                        | 2.363s (36.8)                                                                               |
| Tartaric acid                    | 4.350s (76.7)                                                                               |
| Taurine                          | 3.280 (50.3), 3.440 (38.4)                                                                  |
| Threonine                        | 1.337d (22.4), 4.273q (68.8), (182.4)                                                       |
| Trigonelline                     | 8.835t (148.0), 9.121s (148.4)                                                              |
| Trimethylamine-N-Oxide           | 3.280 (62.5)                                                                                |
| Tyrosine                         | 6.900 (118.0), 7.190 (133.7)                                                                |
| Valeric acid                     | 0.880m (15.9), 0.930m (15.9), 1.560 (28.0), 2.200 (40.0)                                    |
| Valine                           | 0.995d (19.5), 1.050d (20.9), 2.276 (34.4), (63.3)                                          |
| $\alpha$ -Hydroxyisobutyric acid | 1.365s (29.5), (76.5), (187.1)                                                              |
| $\alpha$ -Ketoglutarate          | 3.01 (57.3)                                                                                 |

<sup>a</sup> Multiplicities annotated as s, singlet; d, doublet; t, triplet; q; quartet; m, multiplet; <sup>b</sup> <sup>13</sup>C chemical shifts directly coupled to the <sup>1</sup>H in Heteronuclear Single Quantum Coherence spectra.



**Table S2.** Metabolites Identified in Serum NMR Spectra.

| <b>Metabolite</b>   | <b><sup>1</sup>H Shifts <sup>a</sup> and Multiplicities</b> |
|---------------------|-------------------------------------------------------------|
| 3-Hydroxybutyrate   | 1.219d                                                      |
| Acetate             | 1.935s                                                      |
| Acetoacetate        | 2.300s                                                      |
| Acetone             | 2.248s                                                      |
| Alanine             | 1.499d                                                      |
| Asparagine          | 2.871d, 2.951d                                              |
| Citrate             | 2.554d, 2.701d                                              |
| Creatine            | 3.059s, 3.948s                                              |
| Creatinine          | 3.062s, 4.072s                                              |
| Formate             | 8.478s                                                      |
| Glucose             | 3.269t, 3.403–3.576m, 3.716–3.939m                          |
| Glutamine           | 2.152m, 2.475m, 3.772m                                      |
| Glycerol            | 3.677m                                                      |
| Glycine             | 3.58s                                                       |
| Histidine           | 7.808s, 7.081s, 3.14m                                       |
| Isoleucine          | 1.028d                                                      |
| Lactate             | 1.347d, 4.131q                                              |
| Leucine             | 0.983d, 0.963d, 1.734m                                      |
| Lysine              | 1.916m                                                      |
| Methanol            | 3.38s                                                       |
| Methionine          | 2.662t                                                      |
| N-Acetylated groups | 2.059s                                                      |
| Phenylalanine       | 7.449t, 7.393t, 7.352d                                      |
| Proline             | 2.37m, 3.354m                                               |
| Propylene Glycol    | 1.139d                                                      |
| PtdCho              | 3.238b                                                      |
| Pyruvate            | 2.39s                                                       |
| Threonine           | 3.593d, 1.347d, 4.271q                                      |
| Tyrosine            | 7.217d, 6.920d                                              |
| Valine              | 1.06d, 1.009d, 3.63d                                        |

<sup>a</sup> Multiplicities annotated as s, singlet; d, doublet; t, triplet; q, quartet; m, multiplet; b, broad signal.

**Table S3.** Additional prediction model parameters for urine spectra.

| Pregnancy Outcome           | Variable Selection Method | No. Variables | No. Latent Variables in Prediction Model | <i>p</i> -Value |
|-----------------------------|---------------------------|---------------|------------------------------------------|-----------------|
| PE<br>( <i>n</i> = 26)      | None                      | 27,084        | 1                                        | <0.01           |
|                             | VIP $\geq$ 1              | 3747          | 1                                        | <0.01           |
|                             | CARS                      | 54            | 1                                        | <0.01           |
| GH<br>( <i>n</i> = 20)      | None                      | 27,084        | 1                                        | <0.01           |
|                             | VIP $\geq$ 1              | 4653          | 1                                        | 0.01            |
|                             | CARS                      | 8             | 1                                        | 0.04            |
| PE + GH<br>( <i>n</i> = 46) | None                      | 27,084        | 1                                        | <0.01           |
|                             | VIP $\geq$ 1              | 3789          | 1                                        | <0.01           |
|                             | CARS                      | 45            | 4                                        | <0.01           |

Abbreviations: CARS, Competitive adaptive reweighted sampling; GH, Gestational Hypertension; PE, preeclampsia; VIP, Variable importance in projection. The *p*-values are from 100 permutation tests.

**Table S4.** Additional prediction model parameters for serum spectra.

| Pregnancy Outcome           | Variable Selection Method | No. Variables | No. Latent Variables in Prediction Model | <i>p</i> -Value |
|-----------------------------|---------------------------|---------------|------------------------------------------|-----------------|
| PE<br>( <i>n</i> = 26)      | None                      | 13,420        | 4                                        | >0.05           |
|                             | VIP $\geq$ 1              | 1081          | 7                                        | >0.05           |
|                             | CARS                      | 105           | 3                                        | 0.05            |
| GH<br>( <i>n</i> = 20)      | None                      | 13,420        | 1                                        | >0.05           |
|                             | VIP $\geq$ 1              | 1259          | 7                                        | >0.05           |
|                             | CARS                      | 87            | 4                                        | 0.02            |
| PE + GH<br>( <i>n</i> = 46) | None                      | 13,420        | 4                                        | 0.01            |
|                             | VIP $\geq$ 1              | 1328          | 4                                        | <0.00           |
|                             | CARS                      | 51            | 6                                        | 0.02            |

Abbreviations: CARS, Competitive adaptive reweighted sampling; GH, Gestational Hypertension; PE, preeclampsia; VIP, Variable importance in projection. The *p*-values are from 100 permutation tests.

**Table S5.** NMR spectroscopy parameters.

| Biofluid | Spectrum Shorthand | Pulse Sequence   | Temp (K) | FID Size          | Scans | Spectral Width (ppm)      |
|----------|--------------------|------------------|----------|-------------------|-------|---------------------------|
| Urine    | NOESY              | noesygppr1d      | 300      | 65,536            | 32    | 20.5682                   |
|          | JRES               | jresgpprqf       | 300      | 8192 $\times$ 40  | 2     | 16.6602 $\times$ 0.1302   |
|          | HSQC               | hsqcedetgpsisp.2 | 300      | 2048 $\times$ 256 | 32    | 16.0194 $\times$ 165.6500 |
|          | COSY               | cosygpprqf       | 300      | 4096 $\times$ 512 | 8     | 16.0194 $\times$ 16.0194  |
|          | HSQC-TOCSY         | hsqcdietgpsisp.2 | 300      | 2048 $\times$ 256 | 32    | 12.0146 $\times$ 165.6580 |
|          | HMBC               | hmbcetgpl3ndpr   | 300      | 4096 $\times$ 256 | 128   | 16.0194 $\times$ 209.9990 |
| Serum    | NOESY              | noesygppr1d      | 310      | 98,304            | 32    | 29.8927                   |
|          | CPMG               | cpmgpr1d         | 310      | 65,536            | 64    | 20.0243                   |
|          | JRES               | jresgpprqf       | 310      | 8192 $\times$ 40  | 1     | 16.6602 $\times$ 0.1302   |

Abbreviations: COSY, Correlated spectroscopy; CPMG, Carr-Purcell-Meiboom-Gill pulse sequence; HMBC, Heteronuclear multiple bond correlation spectroscopy; HSQC, Heteronuclear single quantum coherence spectroscopy; JRES, J-resolved spectroscopy; NOESY, Nuclear overhauser effect spectroscopy; TOCSY, Total correlation spectroscopy.
